# Supplementary material for: The cost of illness for childhood clinical pneumonia and invasive pneumococcal disease in Nigeria
Source: PubMed Central journal article supplement (PMC8804652; doi:10.1136/bmjgh-2021-007080), 2022-01-31
Supplement: bmjgh-2021-007080supp001.pdf [file bmjgh-2021-007080supp001.pdf]

## SUPPLEMENTARY MATERIAL

**Table S1: Unit cost estimates and sources for parameters used in cost analysis in (US\$ 2020)**

| Service                               | Unit cost US\$ |      | Source                        |
|---------------------------------------|----------------|------|-------------------------------|
|                                       | AKTH           | MMSH |                               |
| Chest X-ray                           | 6.9            | 4.2  | Radiology department          |
| CSF chemistry, microscopy and culture | 2.2            | 1.7  | Microbiology department       |
| Blood culture                         | 13.9           | 3.3  | Microbiology department       |
| Full blood count                      | 1.5            | 1.4  | Haematology department        |
| Haemoglobin                           | 0.8            | 0.6  | Haematology department        |
| Urea and electrolyte                  | 3.6            | 1.9  | Chemical pathology department |
| Malaria parasite                      | 1.1            | 0.6  | Haematology department        |
| Blood transfusion                     | 13.9           | 13.9 | Haematology department        |
| Oxygen                                | 20.0           | 10.0 | Paediatric ward               |
| Bed day AKTH (full cost)              | 55.5           | 33.3 | Paediatric ward AKTH          |
| Bed day (WHO-CHOICE)                  | 29.8           | 16.7 | WHO-CHOICE                    |
| OPD visit (WHO-CHOICE)                | 7.8            | 7.7  | WHO-CHOICE                    |

Table S2: Description of children and caregivers<sup>1</sup>

|                                                         | Outpatient pneumonia<br>N=244 | Inpatient pneumonia<br>N=117 | Septicaemia<br>N=66 | Meningitis<br>N=53 |
|---------------------------------------------------------|-------------------------------|------------------------------|---------------------|--------------------|
| <b>Hospital n (%)</b>                                   |                               |                              |                     |                    |
| AKTH                                                    | 135(57.2)                     | 48(41.0)                     | 32(48.5)            | 21(39.6)           |
| MMSH                                                    | 109(44.9)                     | 69(59.0)                     | 34(51.5)            | 32(60.4)           |
| <b>Child characteristics</b>                            |                               |                              |                     |                    |
| <b>Age in months</b>                                    |                               |                              |                     |                    |
| Median (IQR)                                            | 17.9 (12-27)                  | 16.3 (12-26)                 | 24.2 (16-36)        | 24.6 (18-31)       |
| <b>Age group(months) n (%)<sup>1</sup></b>              |                               |                              |                     |                    |
| <1-11                                                   | 57 (23.4)                     | 25 (21.4)                    | 6 (9.1)             | 5 (9.4)            |
| 12-23                                                   | 98 (39.7)                     | 58 (49.6)                    | 26 (39.4)           | 19 (35.9)          |
| 24+                                                     | 90 (36.9)                     | 34 (29.1)                    | 34 (51.5)           | 29 (54.7)          |
| <b>Gender, Female n (%)</b>                             |                               |                              |                     |                    |
|                                                         | 119 (48.8)                    | 53 (45.3)                    | 31 (47.0)           | 23 (43.4)          |
| <b>Prior care sought n (%)</b>                          |                               |                              |                     |                    |
| None                                                    | 72 (29.5)                     | 25 (21.4)                    | 15 (22.7)           | 6 (11.3)           |
| Private hospital                                        | 38 (15.6)                     | 17 (14.5)                    | 19 (28.8)           | 22 (41.5)          |
| Chemist                                                 | 106 (43.4)                    | 60 (51.3)                    | 28 (42.4)           | 18 (34.0)          |
| Others                                                  | 28 (11.5)                     | 15 (12.8)                    | 4 (6.1)             | 7 (13.2)           |
| Missing                                                 |                               |                              |                     |                    |
| <b>Caregiver characteristics<sup>1</sup></b>            |                               |                              |                     |                    |
| Age in years, median (IQR)                              | 28.0 (27-30)                  | 29.0 (28-30)                 | 29.0 (28-30)        | 30.0 (28-31)       |
| Relationship to child,<br>Mother                        | 224 (91.8)                    | 115 (98.3)                   | 66 (100.0)          | 49 (92.5)          |
| <b>Highest education of caregiver<sup>1</sup> n (%)</b> |                               |                              |                     |                    |
| None                                                    | 20 (8.2)                      | 7 (6.0)                      | 0 (0.0)             | 1 (1.9)            |
| Primary                                                 | 19 (7.8)                      | 7 (6.0)                      | 2 (3.0)             | 3 (5.6)            |
| Secondary                                               | 88 (36.1)                     | 48 (41.0)                    | 34 (51.5)           | 18 (34.0)          |
| Tertiary                                                | 117 (47.9)                    | 52 (44.4)                    | 29 (43.9)           | 31 (58.5)          |
| Missing                                                 | 0 (0.0)                       | 3 (2.6)                      | 1 (1.5)             | 0 (0.0)            |
| <b>Occupation of caregiver<sup>1</sup> n (%)</b>        |                               |                              |                     |                    |
| Self-employed                                           | 98 (40.2)                     | 54 (46.1)                    | 30 (45.5)           | 20 (37.7)          |
| Salaried work                                           | 97 (39.7)                     | 56 (47.9)                    | 36 (54.5)           | 32 (60.4)          |
| Unemployed                                              | 49 (20.1)                     | 7 (6.0)                      | 0 (0.0)             | 1 (1.9)            |

<sup>1</sup> Main caregiver

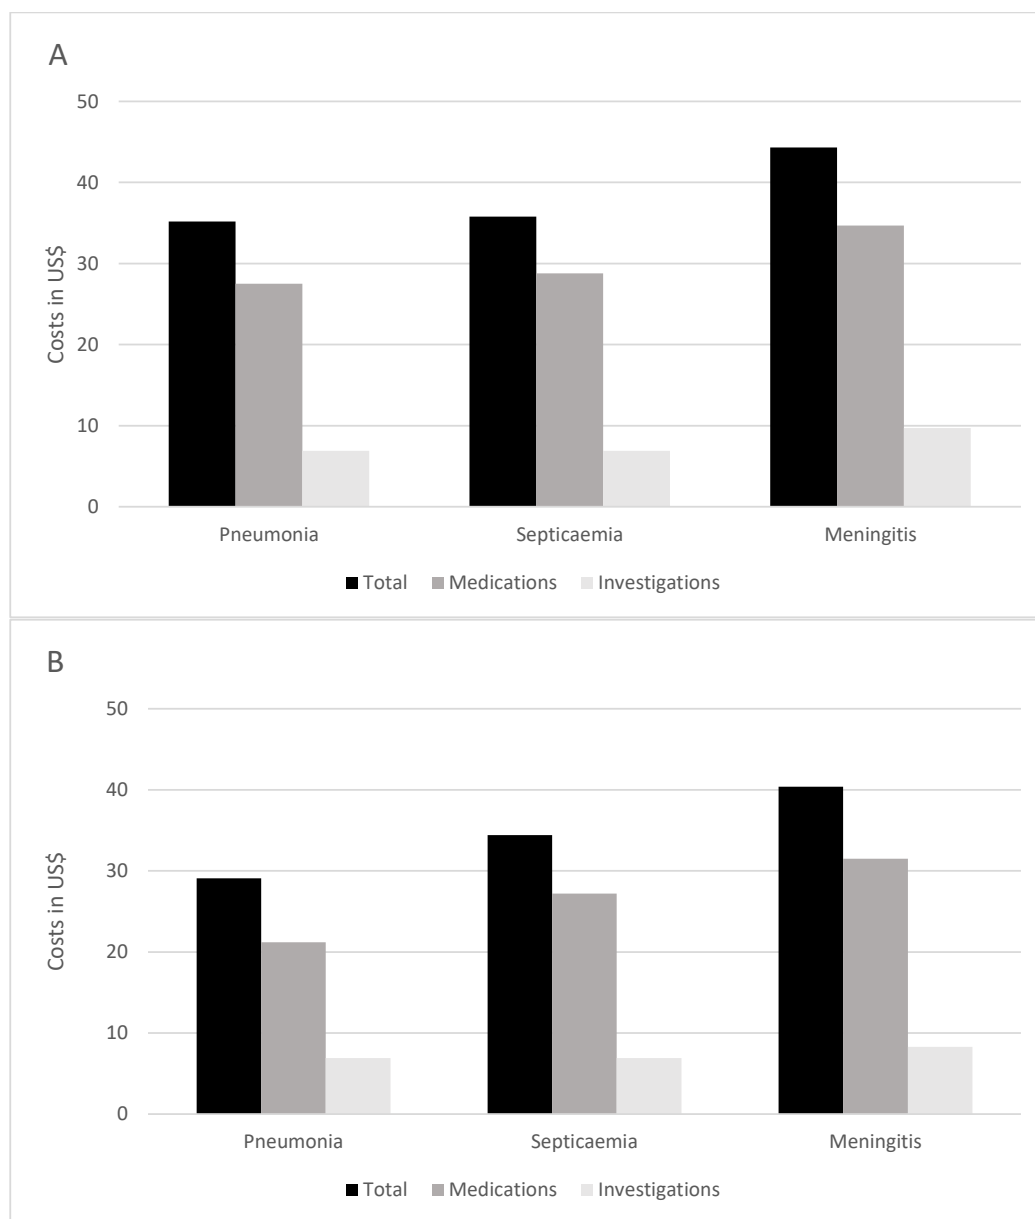

**Figure S1: Breakdown of User fees for AKTH (A) and MMSH (B)**

**Table S3 : Costs incurred by households stratified by income tertiles**

|                      | Household costs as % of monthly household income |              |           |              |                        |              |
|----------------------|--------------------------------------------------|--------------|-----------|--------------|------------------------|--------------|
|                      | Tertile 1 (poorest)                              |              | Tertile 2 |              | Tertile 3 (least poor) |              |
|                      | Mean (SD)                                        | Median (IQR) | Mean (SD) | Median (IQR) | Mean (SD)              | Median (IQR) |
| <b>Pneumonia</b>     |                                                  |              |           |              |                        |              |
| Direct cost          | 34 (62)                                          | 21 (17-29)   | 18 (5)    | 17 (14-20)   | 13 (4)                 | 13 (10-15)   |
| Indirect cost        | 7 (5)                                            | 7 (5-9)      | 7 (3)     | 7 (5-8)      | 6 (3)                  | 6 (4-8)      |
| Total household cost | 41 (61)                                          | 29 (23-39)   | 25 (5)    | 25 (22-28)   | 19 (5)                 | 19 (15-22)   |
| <b>Septicaemia</b>   |                                                  |              |           |              |                        |              |
| Direct cost          | 40 (66)                                          | 27 (20-35)   | 37 (56)   | 21 (16-33)   | 16 (5.40)              | 16 (12-20)   |
| Indirect cost        | 9 (4)                                            | 8 (6-12)     | 9 (3)     | 8 (7-10)     | 7 (4)                  | 6 (4-9)      |
| Total household cost | 49 (68)                                          | 35 (28-42)   | 46 (58)   | 29 (24-44)   | 24 (8)                 | 21 (17-29)   |
| <b>Meningitis</b>    |                                                  |              |           |              |                        |              |
| Direct cost          | 66 (120)                                         | 33 (30-42)   | 25 (8)    | 25 (21-30)   | 16 (5)                 | 16 (13-20)   |
| Indirect cost        | 14 (21)                                          | 9 (6-11)     | 10 (4)    | 9 (8-10)     | 9 (4)                  | 8 (6-10)     |
| Total household cost | 79 (140)                                         | 42 (37-53)   | 34 (9)    | 34 (25-41)   | 24 (6)                 | 24 (22-29)   |

**Table S4: Sensitivity analyses for provider costs in US\$ using WHO-CHOICE estimates of bed-day costs and WTP approach for indirect costs**

|                                    | Costs US\$          |               |             |               |            |               | P value |
|------------------------------------|---------------------|---------------|-------------|---------------|------------|---------------|---------|
|                                    | Inpatient pneumonia |               | Septicaemia |               | Meningitis |               |         |
|                                    | Mean (SD)           | Median (IQR)  | Mean (SD)   | Median (IQR)  | Mean (SD)  | Median (IQR)  |         |
| <b>AKTH</b>                        |                     |               |             |               |            |               |         |
| <u>Provider costs (WHO-CHOICE)</u> |                     |               |             |               |            |               |         |
| Bed day                            | 146 (24)            | 149 (119-149) | 159 (38)    | 149 (148-179) | 189 (32)   | 179 (178-208) | <0.001  |
| Total provider costs               | 223 (44)            | 219 (189-244) | 217 (74)    | 197 (172-238) | 257 (56)   | 253 (226-295) | 0.007   |
| <u>Indirect costs</u>              |                     |               |             |               |            |               |         |
| WTP                                | 25 (22)             | 24 (14-31)    | 41 (51)     | 28 (14-53)    | 56 (36)    | 39 (33-83)    | <0.001  |
| <b>MMSH</b>                        |                     |               |             |               |            |               |         |
| <u>Provider costs (WHO-CHOICE)</u> |                     |               |             |               |            |               |         |
| Bed day                            | 95 (55)             | 84 (83-100)   | 93 (25)     | 84 (83-117)   | 119 (81)   | 100 (84-117)  | 0.004   |
| Total provider costs               | 148 (63)            | 137 (120-153) | 135 (44)    | 124 (108-159) | 179 (98)   | 156 (131-174) | 0.001   |
| <u>Indirect costs</u>              |                     |               |             |               |            |               |         |
| WTP                                | 52 (104)            | 21 (13-50)    | 27 (25)     | 20 (14)       | 73 (134)   | 33 (28-74)    | 0.009   |
